# Supplementary material for: In situ forming injectable γ-poly(glutamic acid)/PEG adhesive hydrogels for hemorrhage control
Source: Royal Society of Chemistry journal article supplement (doi:10.1039/d2bm00525e), 2022-01-01
Supplement: d2bm00525e1.pdf [file d2bm00525e1.pdf]

## Supporting Information

### *In situ* forming injectable $\gamma$ -poly(glutamic acid)/PEG adhesive hydrogels for hemorrhage control

Huijun Ye, Yiwen Xian, Shurong Li, Chong Zhang\*, Decheng Wu\*

Department of Biomedical Engineering, Southern University of Science and Technology, No. 1088 Xueyuan Avenue, Nanshan District 518055, Shenzhen, Guangdong Province, Peoples Republic of China.

\*To whom correspondence should be addressed.

E-mail: zhangc9@sustech.edu.cn

E-mail: wudc@sustech.edu.cn

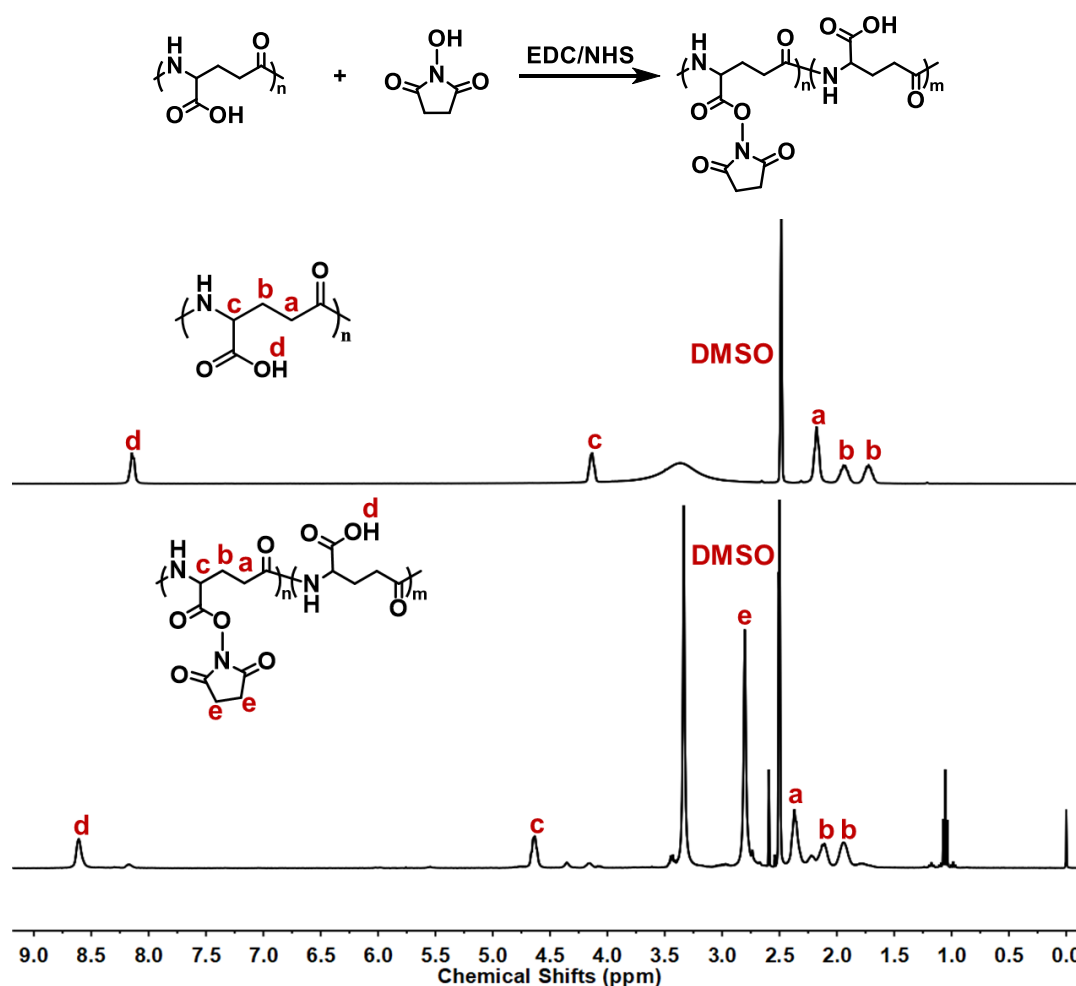

**Fig. S1** Illustration of the preparation of  $\gamma$ -PGA-NHS, and  $^1\text{H}$  NMR spectra of  $\gamma$ -PGA and  $\gamma$ -PGA-NHS.

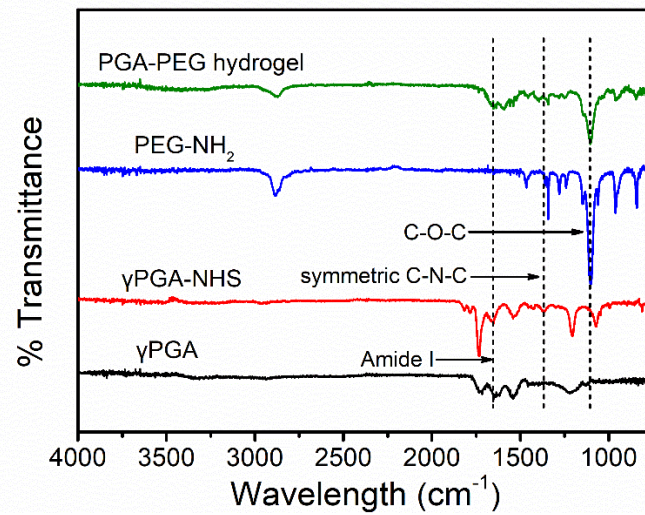

**Fig. S2** Representative ATR-FTIR spectra of the  $\gamma$ PGA,  $\gamma$ PGA-NHS, Tetra-PEG-NH<sub>2</sub> prepolymers and PGA<sub>10</sub>-PEG<sub>20</sub> hydrogels.

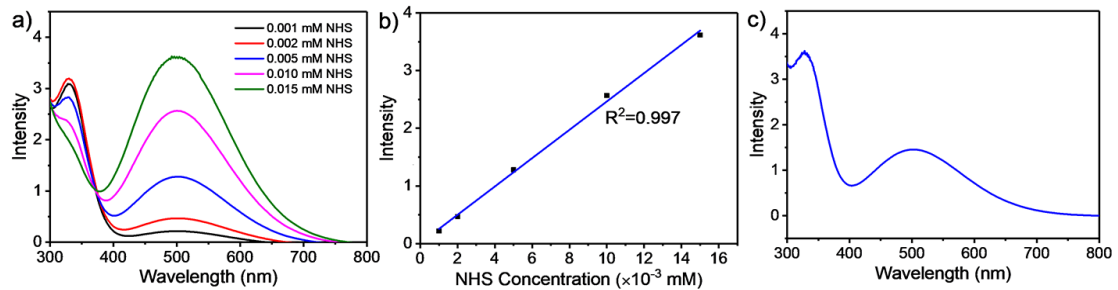

**Fig. S3** a) The UV absorbance of ferric hydroxamate related to different concentrations of NHS. b) The standard curve of NHS. ( $Y = 0.246X + 0.009$ ,  $R^2=0.997$ ) c) The UV absorbance of ferric hydroxamate related to the  $\gamma$ PGA-NHS.

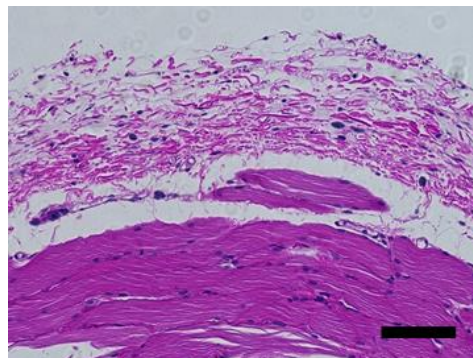

**Fig. S4** H&E staining result of the normal skin tissue of rats. (scale bar: 100  $\mu$ m)
